# Supplementary material for: Thermal stabilization and energy transfer in narrow-band red-emitting Sr[(Mg2Al2)1−y(Li2Si2)yN4]:Eu2+phosphors
Source: Royal Society of Chemistry journal article supplement (doi:10.1039/c7tc05613c), 2018-01-01
Supplement: c7tc05613c1.pdf [file c7tc05613c1.pdf]

## SUPPORTING INFORMATION

### Thermal Stabilization and Energy Transfer in Narrow-band Red-emitting $\text{Sr}[(\text{Mg}_2\text{Al}_2)_{1-y}(\text{Li}_2\text{Si}_2)_y\text{N}_4]:\text{Eu}^{2+}$ Phosphors

Julius L. Leañó, Jr.,<sup>a,b,c</sup> Tadeusz Lesniewski,<sup>d</sup> Agata Lazarowska,<sup>d</sup> Sebastian Mahlik,<sup>d</sup>  
Marek Grinberg,<sup>d</sup> Hwo-Sheunn Sheu,<sup>e</sup> and Ru-Shi Liu<sup>\*a,f</sup>

<sup>a</sup> Department of Chemistry, National Taiwan University Taipei 106, Taiwan

<sup>b</sup> Nanoscience and Technology Program, Taiwan International Graduate Program, Academia Sinica and National Taiwan University, Taipei 106, Taiwan

<sup>c</sup> Philippine Textile Research Institute, Department of Science and Technology, Taguig City 1631, Philippines

<sup>d</sup> Institute of Experimental Physics, Faculty of Mathematic, Physics and Informatics, Gdańsk University, Wita Stwosza 57, 80-308 Gdańsk, Poland

<sup>e</sup> National Synchrotron Radiation Research Center, Hsinchu City 300, Taiwan

<sup>f</sup> Department of Mechanical Engineering and Graduate Institute of Manufacturing Technology National Taipei University of Technology Taipei 106, Taiwan

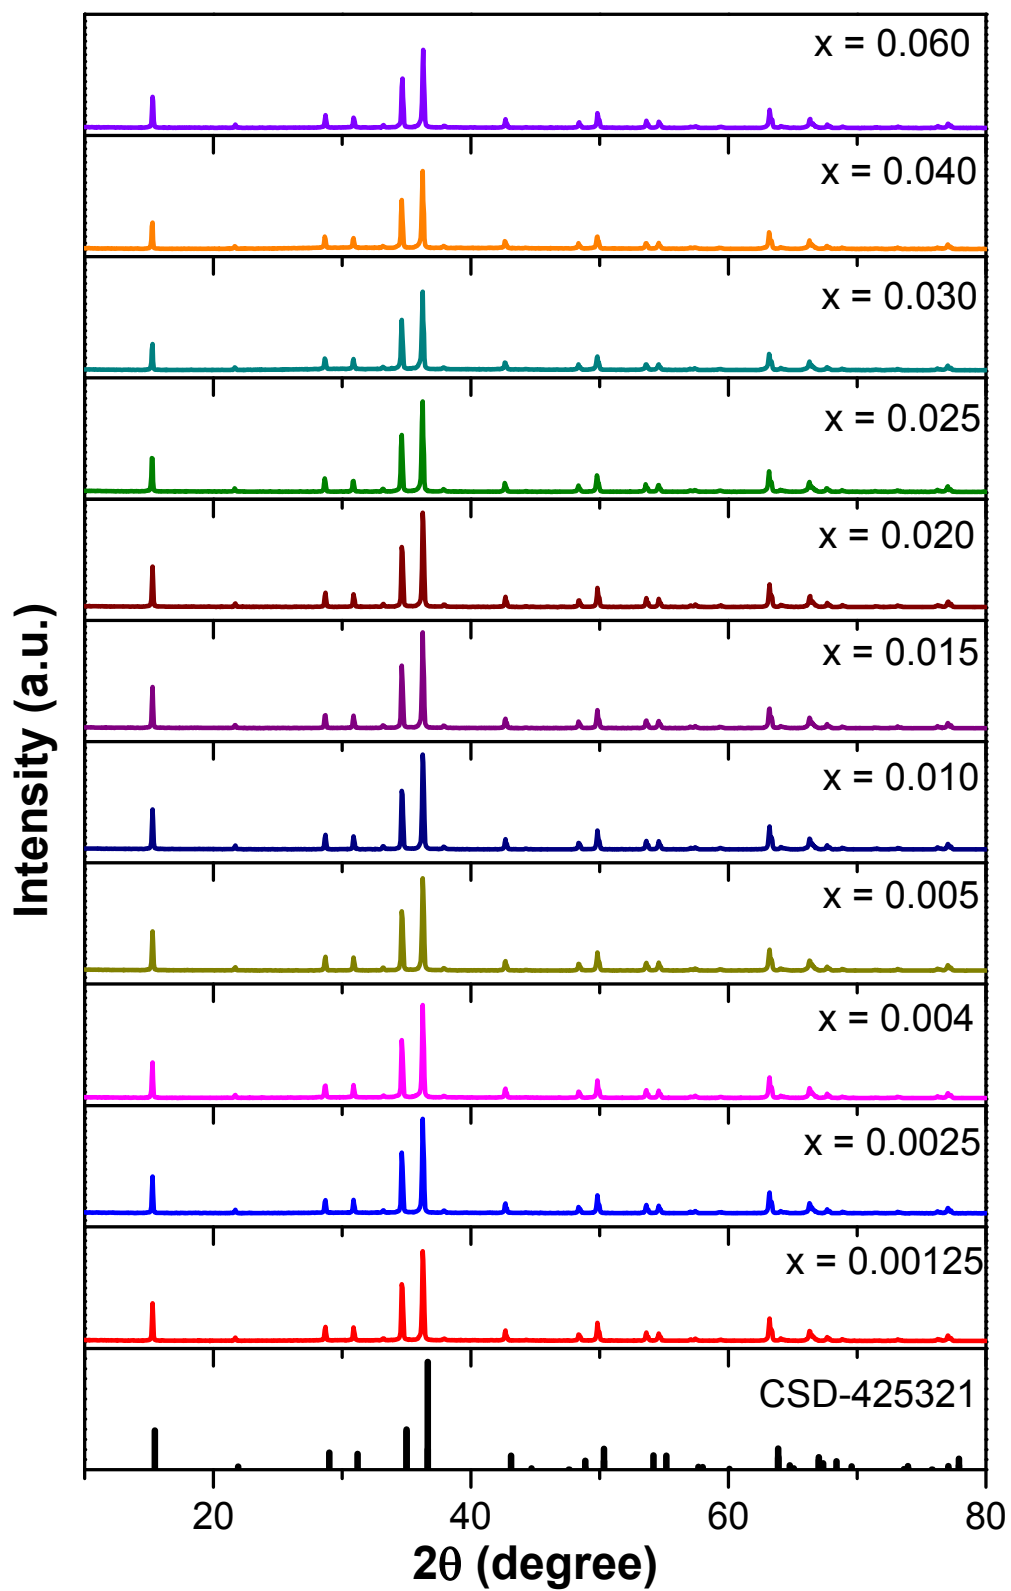

**Fig. S1** Powder X-ray diffraction (XRD) patterns of  $\text{Sr}_{1-x}[(\text{Mg}_2\text{Al}_2)_{1-y}(\text{Li}_2\text{Si}_2)_y\text{N}_4]:\text{Eu}_x^{2+}$  ( $x = 0.00125\text{--}0.06$ ;  $y = 0$ ).

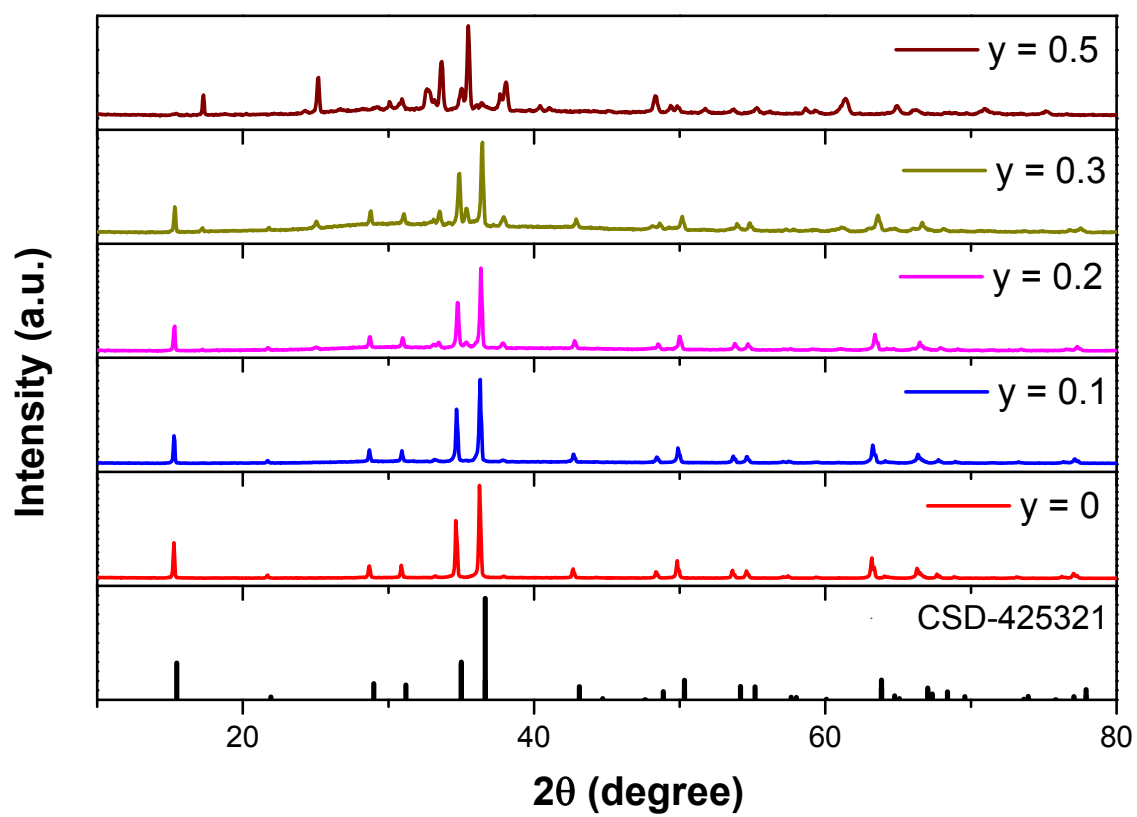

**Fig. S2** Powder XRD pattern of  $\text{Sr}_{1-x}[(\text{Mg}_2\text{Al}_2)_{1-y}(\text{Li}_2\text{Si}_2)_y\text{N}_4]:\text{Eu}_x^{2+}$  ( $x = 0.004$ ;  $y = 0-0.5$ )

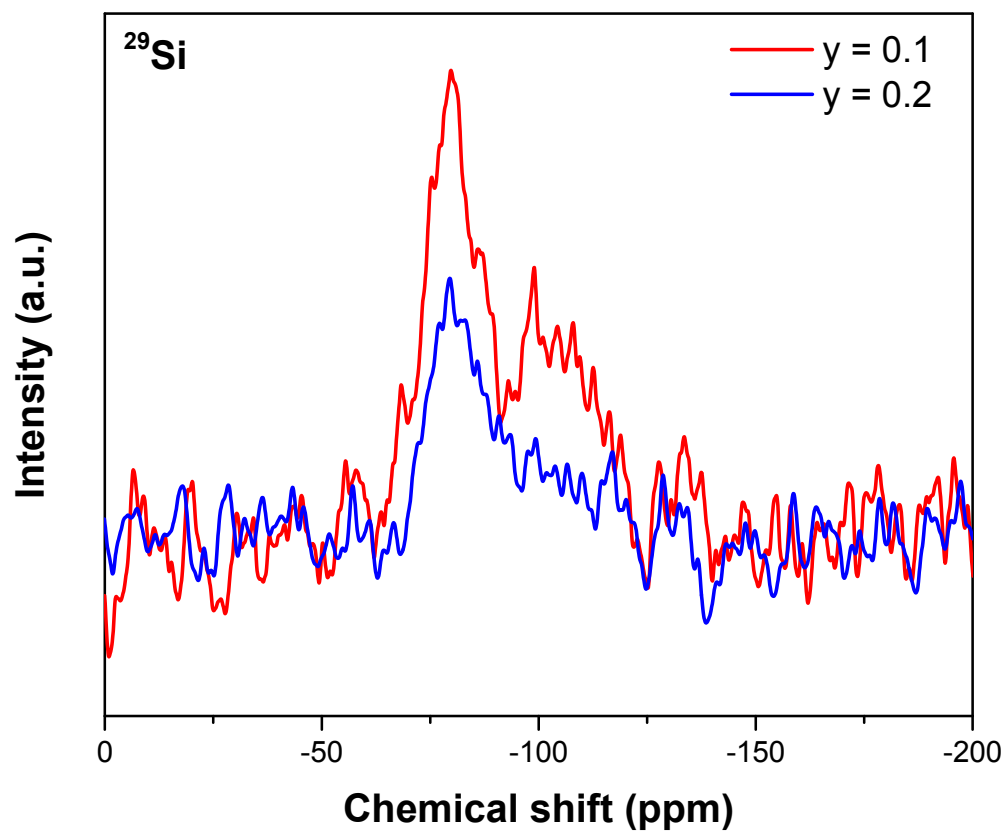

**Fig. S3**  $^{29}\text{Si}$  Solid state-nuclear magnetic resonance spectra of  $\text{Sr}_{0.996}[(\text{Mg}_2\text{Al}_2)_{1-y}(\text{Li}_2\text{Si}_2)_y\text{N}_4]:\text{Eu}_{0.004}^{2+}$

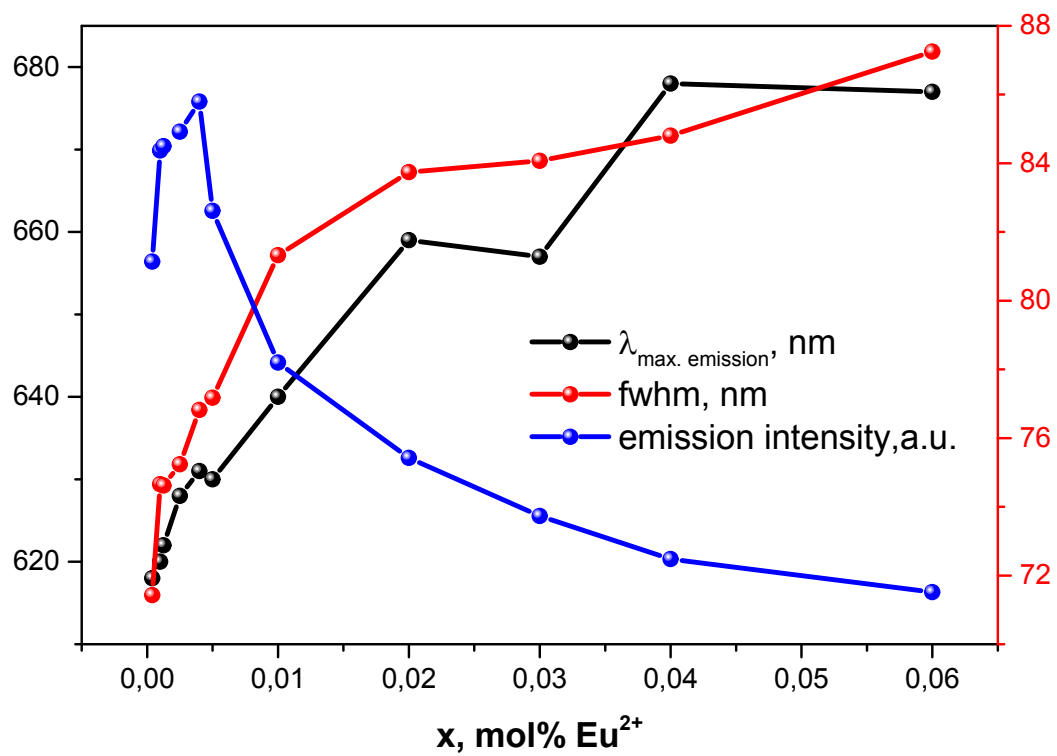

**Fig. S4** Emission wavelength, full-width-at-half-maximum (*fwhm*), and photoluminescence emission intensity.

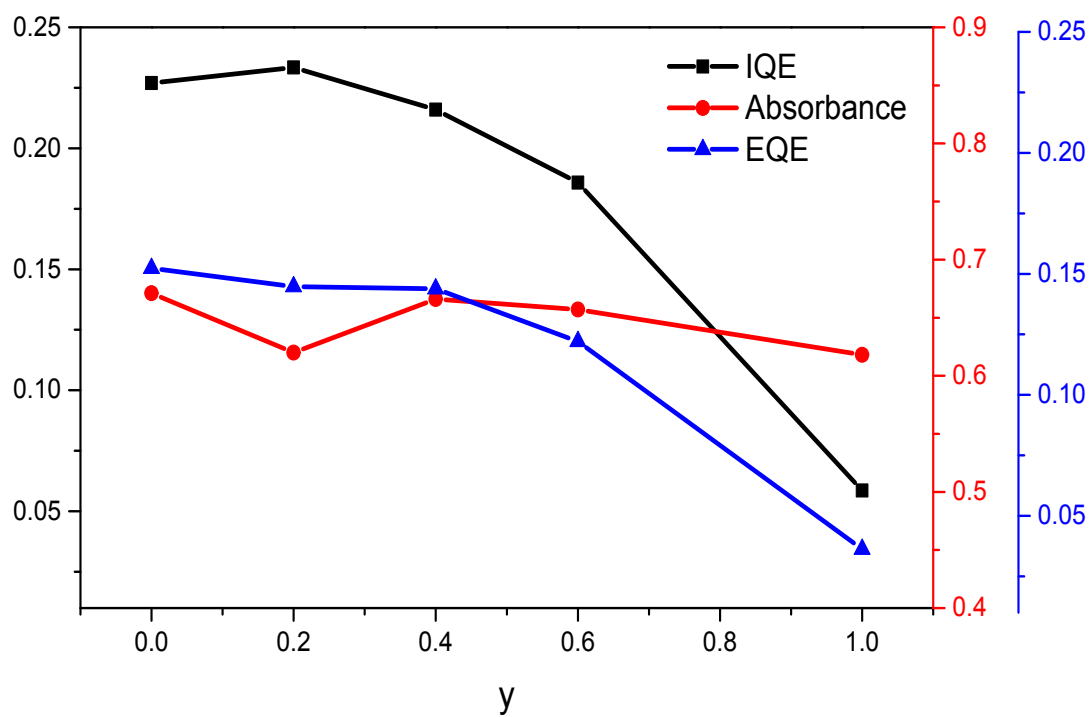

**Fig. S5** Quantum efficiency  $\text{Sr}_{1-x}[(\text{Mg}_2\text{Al}_2)_{1-y}(\text{Li}_2\text{Si}_2)_y\text{N}_4]:\text{Eu}^{2+}$  ( $x = 0.004$ ;  $y = 0-1$ ) at 440 nm.

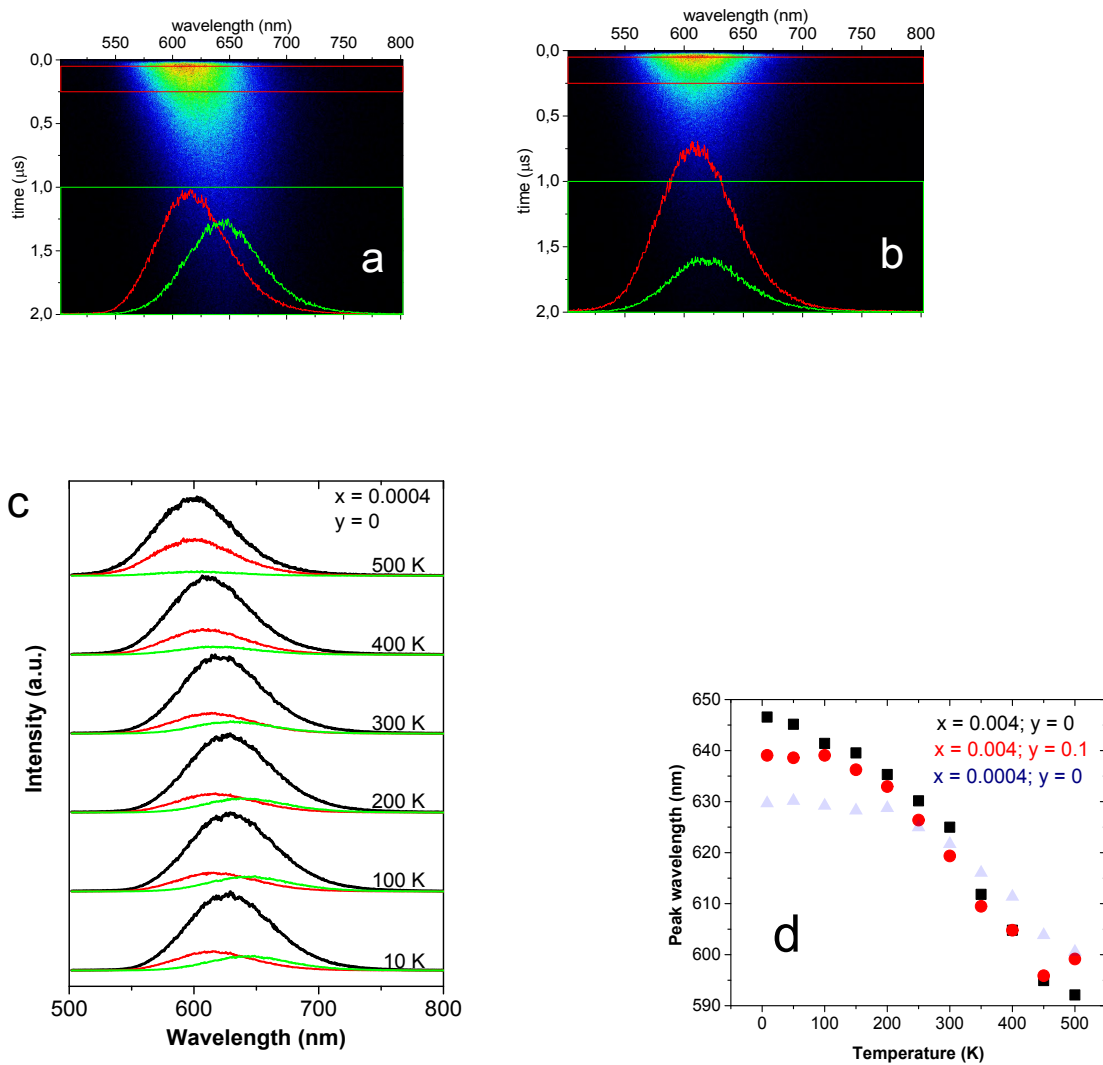

**Fig. S6** Streak image of  $\text{Sr}_{1-x}[(\text{Mg}_2\text{Al}_2)_{1-y}(\text{Li}_2\text{Si}_2)_y\text{N}_4]:\text{Eu}^{2+}$  ( $x = 0.0004$ ,  $y = 0$ ) at (a) 10 and (b) 400 K with excitation wavelength of 425 nm. (c) Temperature-dependent emission spectra of short-time emission (red curves), long-time emission (green curve), and total emission (black curve) for  $\text{Sr}_{0.996}[(\text{Mg}_2\text{Al}_2)_{1-y}(\text{Li}_2\text{Si}_2)_y\text{N}_4]:\text{Eu}^{2+}$   $x = 0.0004$ ,  $y = 0$ . Spectra obtained by integrating streak images at areas denoted by respective colors in Figs. S6a and S6b. (d) Temperature-dependent emission spectra peak position of total emission spectrum (calculated from the whole streak image) of  $\text{Sr}_{0.996}[(\text{Mg}_2\text{Al}_2)_{1-y}(\text{Li}_2\text{Si}_2)_y\text{N}_4]:\text{Eu}^{2+}$ . (a)  $x = 0.0004$ ,  $y = 0$ ; (b)  $x = 0.004$ ,  $y = 0$ ; and (c)  $x = 0.004$ ,  $y = 0$ .

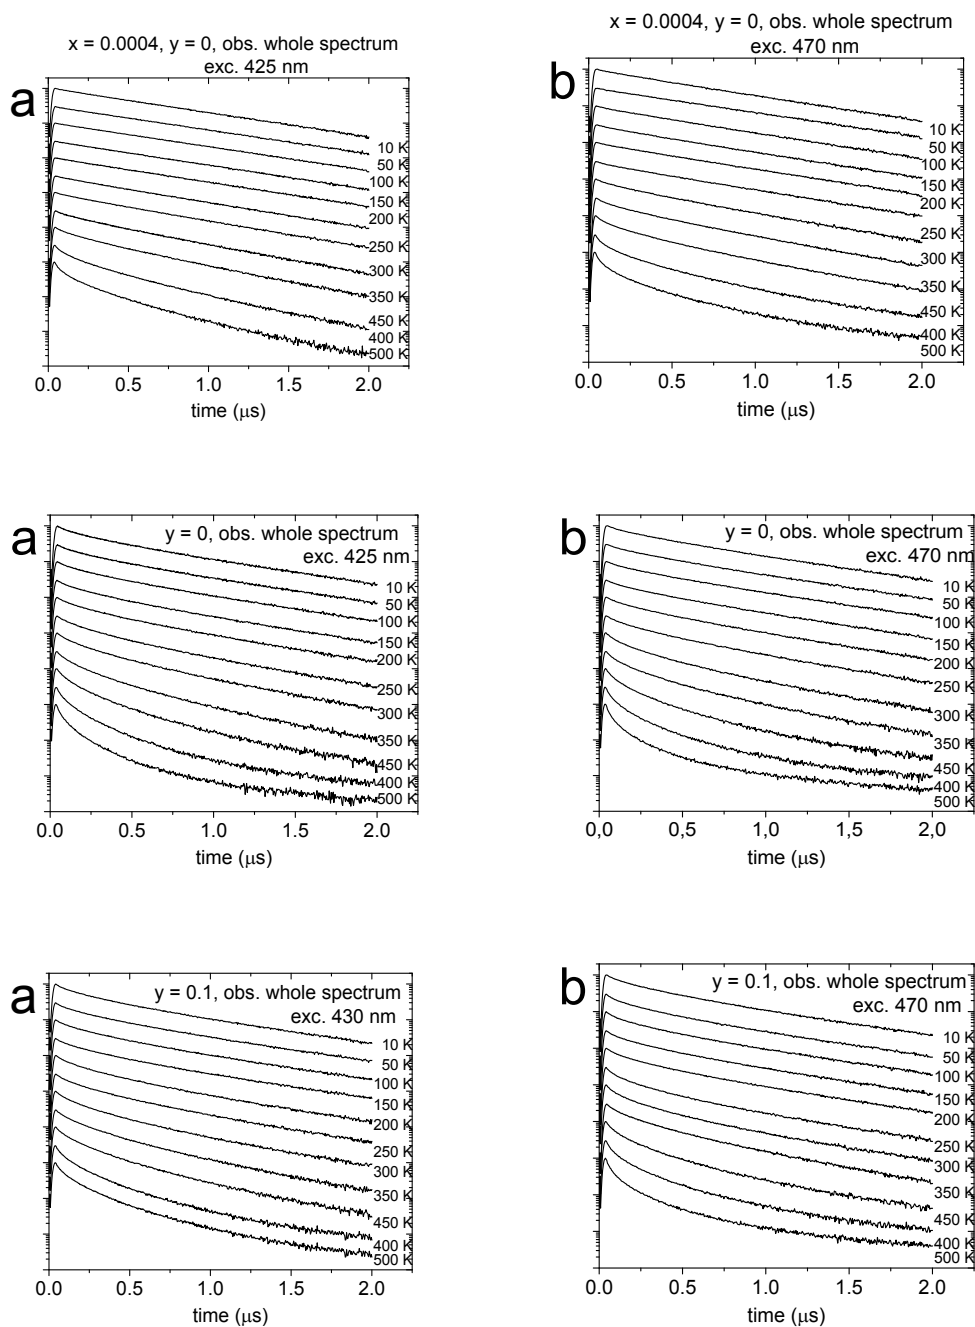

**Fig. S7.** Temperature-dependent decay profiles of  $\text{Sr}_{0.996}[(\text{Mg}_2\text{Al}_2)_{1-y}(\text{Li}_2\text{Si}_2)_y\text{N}_4]:\text{Eu}_{0.004}^{2+}$  under excitation wavelength (a)  $\lambda_{\text{exc}} = 425 \text{ nm}$  and (b)  $\lambda_{\text{exc}} = 470 \text{ nm}$ , (Row 1:  $x = 0.0004, y = 0$ , Row 2:  $x = 0.004, y = 0$ ; Row 3:  $x = 0.004, y = 0.1$ ). The decay profiles have been collected from the whole emission spectrum.



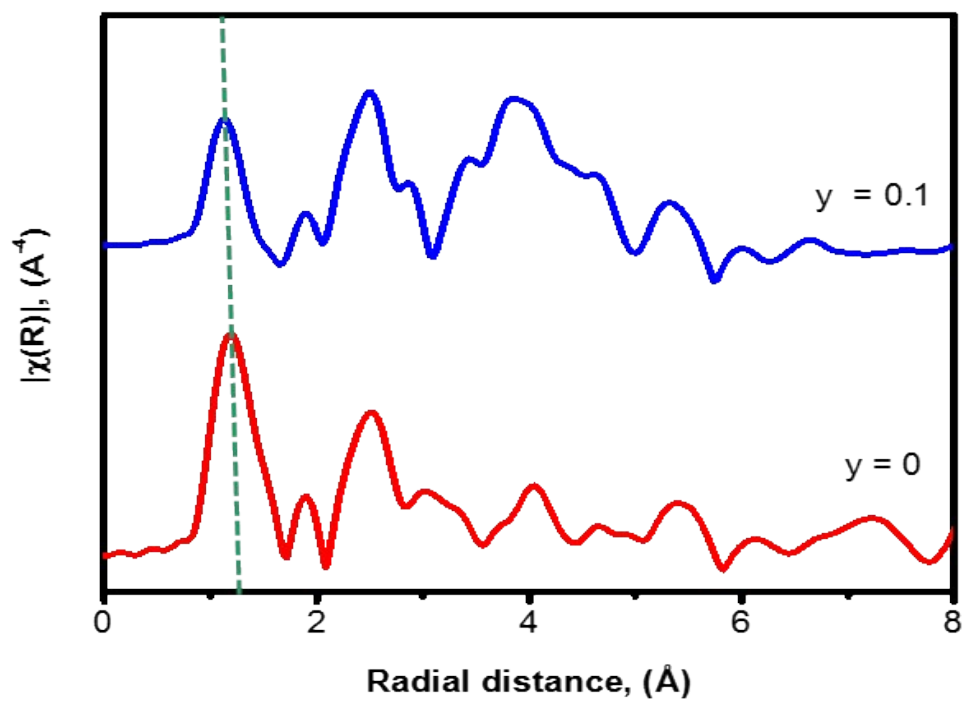

**Fig. S8** Extended X-ray fine structure (EXAFS) of  $\text{Sr}_{1-x}[(\text{Mg}_2\text{Al}_2)_{1-y}(\text{Li}_2\text{Si}_2)_y\text{N}_4]:\text{Eu}_x^{2+}$  ( $x = 0.004$ ,  $y = 0, 0.1$ ).

**Table S1** Crystallographic data of Sr[Mg<sub>2</sub>Al<sub>2</sub>N<sub>4</sub>]:Eu<sup>2+</sup>.

|                                   | Sr[Mg <sub>2</sub> Al <sub>2</sub> N <sub>4</sub> ]              | Sr[Mg <sub>2</sub> Al <sub>2</sub> N <sub>4</sub> ]:Ce <sup>3+</sup>    | Sr <sub>0.996</sub> [(Mg <sub>2</sub> Al <sub>2</sub> ) <sub>1-y</sub> (Li <sub>2</sub> Si <sub>2</sub> ) <sub>y</sub> N <sub>4</sub> ]:Eu <sub>0.004</sub> <sup>2+</sup> |
|-----------------------------------|------------------------------------------------------------------|-------------------------------------------------------------------------|---------------------------------------------------------------------------------------------------------------------------------------------------------------------------|
|                                   | Pust, P. et al., <i>Chem. Mater.</i> <b>2014</b> , 26, 611-6119. | Leaño, J. Jr., et al., <i>Chem. Mater.</i> <b>2016</b> , 28, 6822–6825. | This study                                                                                                                                                                |
| Space group                       | <i>I</i> 4/m                                                     | <i>I</i> 4/m                                                            | <i>I</i> 4/m                                                                                                                                                              |
| Crystal system                    | tetragonal                                                       | tetragonal                                                              | tetragonal                                                                                                                                                                |
| Lattice parameters                |                                                                  |                                                                         |                                                                                                                                                                           |
| <i>a</i> , Å                      | 8.1008 (11)                                                      | 8.17648(8)                                                              | 8.17164(6)                                                                                                                                                                |
| <i>c</i> , Å                      | 3.3269 (7)                                                       | 3.35754(4)                                                              | 3.35780 (3)                                                                                                                                                               |
| Cell volume, Å <sup>3</sup>       | 218.32 (6)                                                       | 224.468 (5)                                                             | 224.220(4)                                                                                                                                                                |
| Crystallographic Information File | CSD 425321                                                       | CSD 431335                                                              |                                                                                                                                                                           |

**Table S2** Fractional atomic coordinates and isotropic displacement parameters

|    |   | x          | y          | z | Occ. | B <sub>eq</sub> |
|----|---|------------|------------|---|------|-----------------|
| Sr | 2 | 0          | 0          | 0 | 1    | 0.689(2)        |
| Mg | 8 | 0.18232(3) | 0.36536(4) | 0 | 0.5  | 1(21)           |
| Al | 8 | 0.18232(3) | 0.36536(4) | 0 | 0.5  | 1               |
| N  | 8 | 0.40296(9) | 0.23687(7) | 0 | 1    | 1.12(8)         |
